# Supplementary material
Source: publisher site journal article supplement (https://subtbiol.pensoft.net/article/66755/download/suppl/39/)
Supplement: Supplementary file 1

## Sheet: SuppTable1
Voucher-specimen ID	Code	Longitude	Latitude	Locality	Country	28S22	COI	H3
CF_10.4	Niphargus dancaui	28.5702	43.8197	Mangalia, str. Gheorge Netoi 1	Romania	KF290042	KF290230	MN915279
DM_lad1	Niphargus ladmiraulti	-1.57613	47.205	Quartier du Chantenay, rue des Salorges (galerie souterraine en partie inondée)	France	GU973462	GU973424	not
FS_10.011	Niphargus salernianus A	15.4546	40.5343	Grotta di Pertosa (1 Cp/SA), Monti Alburni	Italy	MN914014	KY706696	not
FS_11.072	Niphargus stefanellii A	12.9929	41.5176	Grotta di Fiume Coperto (1361 La/LT), Monti Lepini	Italy	MN913999	KY706879	not
FS_11.162	Niphargus tridentinus	11.5809	46.0182	Grotta della Bigonda (243 VT/TN), Selva di Grigno (Valsugana)	Italy	KT878857	KY706896	not
ME_13.100	Niphargus jovanovici	22.0493	39.8774	Melissotrypa cave	Greece	MN114014	KY707023	MN113955
NA003	Niphargus virei C	5.83752	50.8001	Reijmerstok, Dorpstraat 7, well	Netherlands	EF617237	KR905771	JQ815467
NA005	Niphargus longicaudatus F	14.5754	45.0225	waters southern of quarry Voz	Croatia	EF617239	KY643628	JQ815468
NA006	Niphargus longicaudatus E	14.3364	44.8877	Retec, spring	Croatia	EF617240	KR905772	KJ566705
NA007	Niphargus longicaudatus A	14.4601	40.6695	Stream on the road Monte Faito-Vico Equense	Italy	EF617241	KX379137	JQ815469
NA009	Niphargus longicaudatus C	15.5615	41.8996	Sorgente di Laura, lago di Lesina, Scannicandro, Gargano	Italy	EF617243	KX379136	JQ815470
NA011	Niphargus tauri	30.5192	39.7841	Eksisehir, well	Turkey	EF617245	not	MN113958
NA012	Niphargus sp. Huda Luknja	15.1743	46.4145	Huda luknja pri Gornjem Doliču	Slovenia	EF617246	KY643627	MN113959
NA013	Niphargus dobati	14.3055	45.791	Rakov Škocjan, bellow the small natural bridge	Slovenia	EF617247	KR905774	JQ815499
NA015	Niphargus wolfi A	14.4673	45.7452	Križna jama, Bločice, Cerknica	Slovenia	EF617250	KR905775	JQ815500
NA016	Niphargus sp. Podutik	14.4489	46.0733	Podutik, BRS (interstitial)	Slovenia	EF617251	KY643626	MT191808
NA017	Niphargus carniolicus	15.0998	45.8184	Jama pod gradom Luknja - 575	Slovenia	EF617252	KR905776	JQ815501
NA020	Niphargus aquilex B	5.24848	50.121	Wavreille, well 400 m W of Lavreilles	Belgium	EF617255	KX379140	KX379057
NA022	Niphargus labacensis B	14.5406	46.0828	Tomačevo - interstitial	Slovenia	EF617257	KR905777	JQ815474
NA023	Niphargus pectinicauda	14.5406	46.0828	Tomačevo - intersticial	Slovenia	EF617258	KR905778	JQ815475
NA024	Niphargus bajuvaricus	16.5164	48.1834	Lobau, well A96	Austria	EF617259	KX379135	JQ815476
NA026	Niphargus scopicauda	15.1743	46.4145	Huda luknja pri Gornjem Doliču	Slovenia	EF617261	not	JQ815477
NA032	Niphargus schellenbergi	5.57019	50.3396	Well near road 800 m SE od Heyd	Belgium	EF617267	KR905780	JQ815478
NA033	Niphargus sp. Djevojacka pecina	18.6344	44.223	Djevojačka pećina	Bosnia and Herzegovina	EF617268	KX379134	KJ566707
NA034	Niphargus dolenianensis	13.418	45.8364	Torre, river	Italy	EF617269	KX379133	KJ566708
NA036	Niphargus boskovici	17.9785	42.8449	Bjelušica pećina	Bosnia and Herzegovina	EF617271	KR905781	JQ815502
NA044/NA218(COI,28S22)	Niphargus maximus A	20.8147	41.1025	Biljanini izvori	Macedonia	EF617279	KY643603	MN915288
NA046	Niphargus trullipes	17.9839	42.8458	Vjetrenica pri Zavali	Bosnia and Herzegovina	EF617281	KR905783	JQ815504
NA047	Niphargus polymorphus	19.0056	42.3528	Obodska pećina	Montenegro	EF617282	KR905784	JQ815505
NA048	Niphargus rejici	14.4321	45.9684	Podpeško jezero, springs	Slovenia	EF617283	KR905785	JQ815481
NA053	Niphargus salonitanus	16.3291	43.5698	Spring near the church Gospa od Stomorije	Croatia	EF617289	KR905788	JQ815483
NA054/NB208(COI)	Niphargus fjakae	15.6548	43.8358	Bikovica jama	Croatia	EF617290	KY617285	KY617303
NA055	Niphargus sp. Iska vas	14.5134	45.9368	Iška reka, west from Iška vas	Slovenia	EF617291	KY643623	MN113962
NA058	Niphargus pretneri B	16.7869	43.7196	spring at Stražbenica	Croatia	EF617294	KY643622	MT191812
NA059	Niphargus zagrebensis	15.182	45.5646	Gadina, Loka, Črnomelj	Slovenia	EF617295	KR905789	KR905886
NA060	Niphargus dalmatinus	15.5706	43.949	Biba spring	Croatia	EF617296	KR905790	JQ815484
NA061	Niphargus elegans	11.0211	45.4238	San Pancrazio	Italy	EF617297	KR905791	JQ815485
NA062	Niphargus vinodolensis	14.6469	45.2335	Cerovići	Croatia	EF617298	KR905792	JQ815486
NA063	Niphargus brixianus A	10.2742	45.646	Büs Pursì (7 Lo/BS)	Italy	EF617299	KR905793	JQ815487
NA064	Niphargus lessiniensis	10.9702	45.6082	Grotta A del Ponte di Veja (117 V/VR), Monti Lessini	Italy	EF617300	KR905794	JQ815488
NA066	Niphargus puteanus	12.0358	48.9746	Gasthof Zur Walba, spring north of the "Gasthof"	Germany	EF617302	KR905795	KJ566709
NA069	Niphargus auerbachi	9.11555	47.9944	Messkirch, Sachweickart	Germany	EU693292	KX379130	KJ566711
NA071	Niphargus brachytelson	14.8941	45.5258	Lukova jama pri Zdihovem	Slovenia	EU693293	KR905797	JQ815489
NA074	Niphargus costozzae	11.6	45.4833	Grotta della Guerra (127 V/VI)	Italy	EU693294	KX379128	KJ566713
NA076	Niphargus croaticus	16.4713	44.7005	Suvaja pećina, Lušci Palanka	Bosnia and Herzegovina	EU693297	KT007331	JQ815490
NA078	Niphargus factor	17.9839	42.8458	Vjetrenica pri Zavali	Bosnia and Herzegovina	EU693298	KR905798	JQ815508
NA080	Niphargus grandii	13.418	45.8364	Torre, river	Italy	EU693300	KR905799	KJ566715
NA082	Niphargus hadzii	14.2997	45.9525	Pod orehom, spring	Slovenia	EU693301	KR905800	KR905887
NA084	Niphargus illidzensis	18.2672	43.8193	Vrelo Bosne	Bosnia and Herzegovina	EU693304	KR905802	JQ815491
NA086	Niphargus kenki	15.5949	46.1762	spring near the house Sodna vas 25	Slovenia	KR905869	KR905804	KY617556
NA095	Niphargus lunaris	16.695	43.5197	Bubanj vrelo	Croatia	EU693313	KR905807	KR905889
NA096/NA097(COI)	Niphargus novomestanus	14.9686	45.7963	Tominčev studenec	Slovenia	EU693314	KY617552	JQ815509
NA099	Niphargus orcinus	14.4673	45.7452	Križna jama	Slovenia	EU693315	KR905808	JQ815510
NA102	Niphargus parapupetta	14.5406	46.0828	Tomačevo - interstitial	Slovenia	EU693318	not	KJ566717
NA104	Niphargus rhenorhodanensis DE	5.39514	45.9218	Grotte Cormoran	France	EU693319	KR905811	KJ566719
NA105	Niphargus sanctinaumi	20.7407	40.9138	Sv. Naum, spring	Macedonia	EU693320	KR905812	KP133144
NA106	Niphargus slovenicus	14.3377	46.2271	Stražišče	Slovenia	EU693322	KR905813	JQ815493
NA110	Niphargus stygius A	14.3555	45.918	Jelenska jama	Slovenia	KR905870	KR905815	KR905890
NA112	Niphargus subtypicus	15.0998	45.8184	Jama pod gradom Luknja - 575	Slovenia	EU693326	KT007433	JQ815514
NA116	Niphargus vjetrenicensis A	17.9839	42.8458	Vjetrenica pri Zavali	Bosnia and Herzegovina	EU693329	KY617207.1	JQ815521
NA135	Niphargus laisi	7.66175	47.6125	Lorrach	Germany	KX379002	KX379076	KX379058
NA140	Niphargus dobrogicus	28.5358	43.8014	well S Limanu	Romania	KR905871	KR905816	KR905891
NA144	Niphargus vadimi	33.8685	44.4605	Skelska peščera	Ukraine	KR905872	KR905817	KR905892
NA145	Niphargus gallicus	27.7539	44.649	among river Liman, close to Hagieni	Romania	MN914040	KY643633	MN915282
NA147	Niphargus cvijici	17.9864	42.894	Popovo polje, springs	Bosnia and Herzegovina	JQ815554	KR905819	JQ815516
NA148	Niphargus dimorphus	34.2817	44.8549	well in Veles, river Salgyr, Zarechnoe, 18 km ESE from Simferopol	Ukraine	MN914035	not	MN915280
NA149	Niphargus carpathicus	25.5553	45.445	Azuga, well	Romania	MN114019	KY643616	MN113964
NA151	Niphargus hercegovinensis	17.8475	42.9219	Žira jama	Bosnia and Herzegovina	JQ815549	KR905820	JQ815517
NA154	Niphargus decui	28.533	43.8002	Izvir ob Limanu	Romania	KF719272	KR905822	KR905894
NA155	Niphargus tauricus	33.8607	44.4207	Partizanski izvir - jamica, jugo-vzhodno od Čortove lestnice, ob stari cesto do Jalte	Ukraine	KR905874	KR905823	KR905895
NA164	Niphargus bureschi	24.525	43.0623	Mandrata jama	Bulgaria	MN114020	KY643614.1	MN113965
NA166	Niphargus podgoricensis	19.0264	42.6353	springs close to the bridge - Dobro Polje	Montenegro	KR905875	KR905824	KR905896
NA169	Niphargus multipennatus	14.5406	46.0828	Tomačevo - interstitial	Slovenia	KJ566700	KR905825	KJ566721
NA190	Niphargus timavi	14.2263	45.6069	Postenjšek, spring	Slovenia	MN914034	KF719249	MN915292
NA199	Niphargus hebereri 3	16.4454	43.337	Jama na Bijaki	Croatia	MH337831	KY643609	MH337821
NA212	Niphargus zagorae	16.2953	43.6095	Kevina jama	Croatia	KR827044	KR827046	not
NA217/NA899(COI)	Niphargus karkabounasi	23.1392	37.922	Agios Theodoridi, 15 m deep well	Greece	KR905877	KP164477	KR905898
NA221/NA010(H3)	Niphargus pasquinii	13.0041	42.3778	spring near Terme di Cotilia	Italy	EF617244	MN913989	JQ815471
NA501	Niphargus salzburgensis	14.6111	47.5296	Nationalpark Gesäuse, Etzbachquelle (Kölbl Johnsbachquelle) ETZB, Steiermark	Austria	KJ566697	KX379126	KJ566722
NA504	Niphargus ambulator	9.19847	45.8258	Buco del Piombo (2208 Lo/CO), Erba, Como	Italy	KJ566699	KX379125	KJ566723
NA515	Niphargus sp. Jelovica	14.1311	46.2998	Braškavica, cave on Jelovica	Slovenia	MN114022	KY643586	MN113966
NA522	Niphargus sp. Italy	13.5602	45.8148	Springs near Lago di Pietrarossa	Italy	KJ566701	KX379124	KX379059
NA525	Niphargus caspary B	11.7411	48.4029	Freising	Germany	KX379003	KX379123	KX379060
NA526	Niphargus fontanus A	4.96123	50.3501	Gallery of Crupet, water catchment	Belgium	KJ566686	KX379122	KJ566724
NA538/NA018(H3)	Niphargus fongi	14.8301	45.7122	Dolga jama pri Koblarjih	Slovenia	MN914037	KY643584	JQ815472
NA541/NA021(H3)	Niphargus longidactylus	14.5731	46.0804	Sneberje, phreatic alluvial waters of Save river	Slovenia	EF617256	KY643583	JQ815473
NA547	Niphargobates orophobata	14.2457	45.8199	Planinska jama	Slovenia	JQ815552	KY643582	JQ815518
NA599	Niphargus stochi	13.9261	45.4525	Jama pod Krogom	Slovenia	JQ815551	KY643576	JQ815519
NA600	Niphargus microcerberus B	13.8337	46.0952	river Trebuščica (intersticial), Dolenja Trebuša	Slovenia	MN114023	KY643575	MK421124
NA792/NA800(COI)	Niphargus bihorensis A	22.48	46.7625	Meziad cave	Romania	KF218727	KF218663	KF218657
NA794	Niphargus bihorensis B	22.5139	46.9525	Vadu Crişului Cave	Romania	KF218731	KF218667	KF218651
NA902	Niphargus laticaudatus B	22.5482	46.9331	Ungurului cave	Romania	KF218730	KF218712	KF218659
NA905	Niphargus laticaudatus A	22.4833	46.8667	Grueţ cave	Romania	KF218722	KF218687	KF218658
NA944	Niphargus transsylvanicus B	22.3921	46.8498	Ciur Izbuc Cave	Romania	KF218716	KF218714	KF218653
NA964	Niphargus kolombatovici	17.8475	42.9219	Žira cave	Bosnia and Herzegovina	JQ815553	KY617488	JQ815522
NB041	Niphargus steueri	13.8451	44.8967	well near Vodnjanska cesta, Ližnjemore	Croatia	MN915291	KT007368	MN915291
NB093	Niphargus pontoruffoi	28.4747	43.8025	Hagieni spring ob Limanu Lake	Romania	MK421144	KY643637	MN915295
NB105	Niphargus alisadri	48.2833	35.2667	Alisadr Cave	Iran	KF581049	KF581079	KR905904
NB106	Niphargus hosseiniei	44.4347	39.3768	Brolan Spring	Iran	KF581054	KF581064	KR905905
NB111	Niphargus ilamensis	46.7667	33.3333	Sarab-e-Kanipahn	Iran	KF581038	KF581069	KR905911
NB113	Niphargus bisitunicus	47.4667	34.4167	Biston Spring	Iran	KF581050	KF581062	KR905914
NB117	Niphargus darvishi	50.2167	32.5	Dimeh Spring	Iran	KF581043	KF581072	KR905917
NB118	Niphargus sharifi	48.3	33.5833	Sarab-e-Robat	Iran	KF581048	KF581078	KR905919
NB119	Niphargus khwarizmi	48.2167	34.05	Sarab-e-Niaz	Iran	KF581057	KF581051	KR905920
NB132	Niphargus daniali	50.8833	36.6833	Danial cave	Iran	KF581033	KF581080	KR905926
NB133	Niphargus sp. Libanon A	35.6643	34.2498	Magharit jama	Lebanon	KF581059	KF581081	KR905927
NB134	Niphargus liburnicus B	14.119	45.7169	Vodna jama v Lozi	Slovenia	KT007477	KT007419	MK421125
NB205	Niphargus longiflagellum	14.9092	45.5204	Jelovička jama	Slovenia	MN914006	not	MN915287
NB402/NC058(COI)	Niphargus virei B	6.72622	46.9585	Source de la Noiraigue	Switzerland	KJ566680	KX379198	KJ566727
NA100	Niphargus pachytelson	14.9092	45.5204	Jelovička jama	Slovenia	EU693316	KR905809	JQ815511
NB437	Niphargus rhenorhodanensis ABC	7.15085	47.4543	Vendline, Vendlincourt source	Switzerland	KJ566681	KX379117	KJ566741
NB439	Niphargus rhenorhodanensis H	7.10214	47.3582	Source Bellefontaine	Switzerland	KJ566685	KX379116	KJ566733
NB443	Niphargus thienemanni	8.81782	46.9004	Ruosalper Bach, Unterschächen	Switzerland	KJ566688	KX379114	KJ566729
NB535/HBG2998(COI)	Niphargus hrabei H	19.0358	47.5181	Molnar Janos cave	Hungary	MN914029	MG548163	MN915284
NB541	Niphargus aggtelekiensis B	20.7489	48.5208	Rakoczi 1 cave	Hungary	MN914032	KY643570	MN915271
NB542	Niphargus aggtelekiensis A	20.544	48.4831	Baradla-also Cave	Hungary	MN914031	KY643569	MN915270
NB550/NC041(COI)	Niphargus gebhardti	18.1158	46.1374	Abaligeti cave	Hungary	KP967556	KP967553	KP967550
NB554	Niphargus molnari	18.1158	46.1374	Abaligeti cave	Hungary	MN914038	KY643567	MN915289
NB604	Niphargus antipodes	17.0162	43.5831	Bilobrkova pećina	Bosnia and Herzegovina	KY617131	KY643566	KY617304
NB619	Niphargus iskae	14.5321	45.8136	spring along Iška (Mačji rep, cac. 3.5km from the main spring)	Slovenia	KY617382	KY617490	KY617571
NB621	Niphargus malagorae	14.8226	45.7031	Vančeva jama	Slovenia	KY617384	KY643562	KY617573
NB625	Niphargus kapelanus	15.0238	45.261	Špilja pod Mačkovim dragom	Croatia	KY617387	KY617494	KY617576
NB794	Niphargus chagankae	15.0821	45.5499	Čaganka, Miklarji, Črnomelj	Slovenia	KY617399	KY617499	KY617587
NB800	Niphargus cvajcki	14.8701	45.856	Rivčja jama	Slovenia	KY617405	KY617505	KY617593
NB909	Niphargus mirocensis	22.279	44.5127	Rakin ponor	Serbia	KR827047	not	KR827048
NB910	Niphargus podpecanus	14.7251	45.9178	Lučka jama	Slovenia	KY617430	KY617526	KY617614
NB917/NB922(COI)	Niphargus likanus	15.224	45.267	Đula - Medvedica sustav	Croatia	KY617435	KY617531	KY617619
NC012	Niphargus irlandicus	-9.37758	53.0161	Doolin River Cave	Ireland	not	KY643556	MN113970
NC017	Niphargus glenniei	-3.53426	50.6285	North Kenwood, spring collecting chamber	United Kingdom	MN914041	not	MN915283
NC019	OUTGROUP: Microniphargus leruthi A	-9.28773	53.0777	Polldubh, Galway, Clare	Ireland	KX379004	not	KX379049
NC022	Niphargus brixianus B	9.53024	45.7982	Grotta sotto la Cornabusa (1177 Lo/BG)	Italy	KX379005	KX379113	KX379050
NC024	Niphargus poianoi	10.4411	44.3907	Poiano, mineral springs near river Secchia	Italy	KX379006	KX379112	KX379061
NC025	Niphargus montanarius	12.9619	43.4008	Frassasi cave system, Genga	Italy	KX379007	KX379111	KX379051
NC026	Niphargus ictus	12.9619	43.4008	Frassasi cave system	Italy	KX379008	KX379110	KX379062
NC027	Niphargus frasassianus	12.9619	43.4008	Frassasi cave system, Genga	Italy	KX379009	KX379077	KX379063
NC031	Niphargus minor	13.774	46.1539	river Bača (intersticial), Bača pri Modreju	Slovenia	MN114028	KY643552	MN113972
NC032	Niphargus buturovici	17.2917	43.2449	Vašja jama	Croatia	MN914022	KY643551	MN915278
NC033	Niphargus romuleus	12.5191	43.5556	Grotta dei Cinque Laghi (555 Ma/PS), Monte Nerone	Italy	KX379010	KX379078	KX379052
NC034	Niphargus brevicuspis	18.6758	42.6558	Vojvode Dakovića ili Vojvodina pećina	Montenegro	MN914028	KY643550	MN915276
NC043	Niphargus brixianus C	8.95392	45.901	Boegia, Riva San Vitale	Switzerland	KX379012	KX379108	KX379064
NC046/NC110(28S22)	Niphargus rhenorhodanensis FG	7.18224	47.2784	Gouffre Creux dentier	Switzerland	KX379034	KX379107	KX379065
NC050	Niphargus sp. Maeltalhoehle	8.88129	46.975	Chli Maelchtalhoehle	Switzerland	KX379016	KX379103	KX379070
NC059	Niphargus murimali	8.7971	46.979	Hölloch Senke	Switzerland	KX379022	KX379097	KX379071
NC060	Niphargus styx	8.7971	46.979	Hölloch Senke	Switzerland	KX379023	KX379096	KX379066
NC061	Niphargus muotae	8.80229	46.9799	Hoelloch Versickerung	Switzerland	KX379024	KX379095	KX379067
NC099	Niphargus aulicus	16.6386	43.5485	Drinovčuša jama	Croatia	MN914026	MN913980	MN915274
NC104	Niphargus cvetkovi	23.596	42.6052	Novi Han (Novi Khan)	Bulgaria	MT191526	not	MT191844
NC107	Niphargus cf. thienemanni 1	8.07347	46.1803	Laggina, Zwischbergen	Switzerland	KX379031	KX379074	KX379053
NC120	Niphargus rhenorhodanensis FG1	6.8039	46.9634	Grotte du Chemin de Fer	Switzerland	KX379044	KX379082	not
NC171	Niphargus cf. thienemanni 2	10.3753	46.8054	Uina, Scuol	Switzerland	MH172406	MH172431	not
NC178	Niphargus tonywhitteni	8.03193	48.3333	Biberach, Schwarzwald	Germany	MH172414	MH172432	not
NC204	Niphargus luchoffmani	7.84083	46.7535	Marchbachquelle	Switzerland	MH172405	MH172433.1	MH172418
NC213	Niphargus sp. Meskla	23.9561	35.4002	Spring of Meskla	Greece	MN114031	MN113981	MN113976
NC219	Niphargus rhenorhodanensis JK	7.68964	46.4951	Oescibach	Switzerland	MH172416	MH172436	MH172422
NC944	Niphargus arolaensis sp. nov.	7.28756	47.0406	Stedtliquelle	Switzerland	not	MW721668	not
NC945	Niphargus arolaensis sp. nov.	7.28756	47.0406	Stedtliquelle	Switzerland	not	MW721669	not
NC947	Niphargus arolaensis sp. nov.	7.28756	47.0406	Stedtliquelle	Switzerland	MW794209	MW721670	MW736899
NC964	Niphargus sp. Borgnone	8.60381	46.1665	Costa Borgnone Spring	Switzerland	MW794208	MW721683	MW736900
NC974	Niphargus arolaensis sp. nov.	8.20928	47.3506	Stoeckhof	Switzerland	not	MW721692	not
NC987	Niphargus arolaensis sp. nov.	8.00724	47.3192	Koelliken	Switzerland	not	MW721703	not
NC989	Niphargus arolaensis sp. nov.	8.00724	47.3192	Koelliken	Switzerland	not	MW721705	not
NC996	Niphargus sp. Leuzigen	7.47016	47.1727	Leuzigen	Switzerland	not	MW721712	not
ND454	Niphargus sp. Ebenalp	9.41543	47.2782	Ebenalp	Switzerland	not	MW721759	not
ND462	Niphargus cf. thienemanni 1	10.2653	46.6482	Zernez	Switzerland	not	MW721766	not
PN0131	OUTGROUP: Pseudoniphargus portosancti	-16.3409	33.0669	Madeira, Porto Santo, Fonte do Tanque	Portugal	KY441102	not	KY441077
PN0167	OUTGROUP: Pseudoniphargus gorbeanus	-2.62161	43.0478	Alava, Artzegiko Koba, Cigoitia	Spain	KY441101	KY441043	KY441075
PN0243	Haplogynglymus morenoi	0.24773	41.2113	Zaragoza, Nonaspe	Spain	KY441079	KY441020	KY441053
PN0250	Niphargus sp. 2 Navarra	-1.54716	43.2689	Zugarramurdi, Navarra, Cueva de las Brujas	Spain	KY441083	KY441131	KY441062
PN1371	Haplogynglymus sp. Spain	-4.77926	37.8761	Cordoba, Arzobispo Portocarrero street	Spain	KY441092	KY441019	KY441051
